# Supplementary figures and images for: Comparative Analyses of Cytochrome P450s and Those Associated with Secondary Metabolism in Bacillus Species
Source: MDPI journal article supplement (doi:10.3390/ijms19113623), 2018-11-16

# Taxonomy

- CYP152
- CYP102
- CYP134
- CYP113
- CYP106
- CYP109
- CYP107

0.1

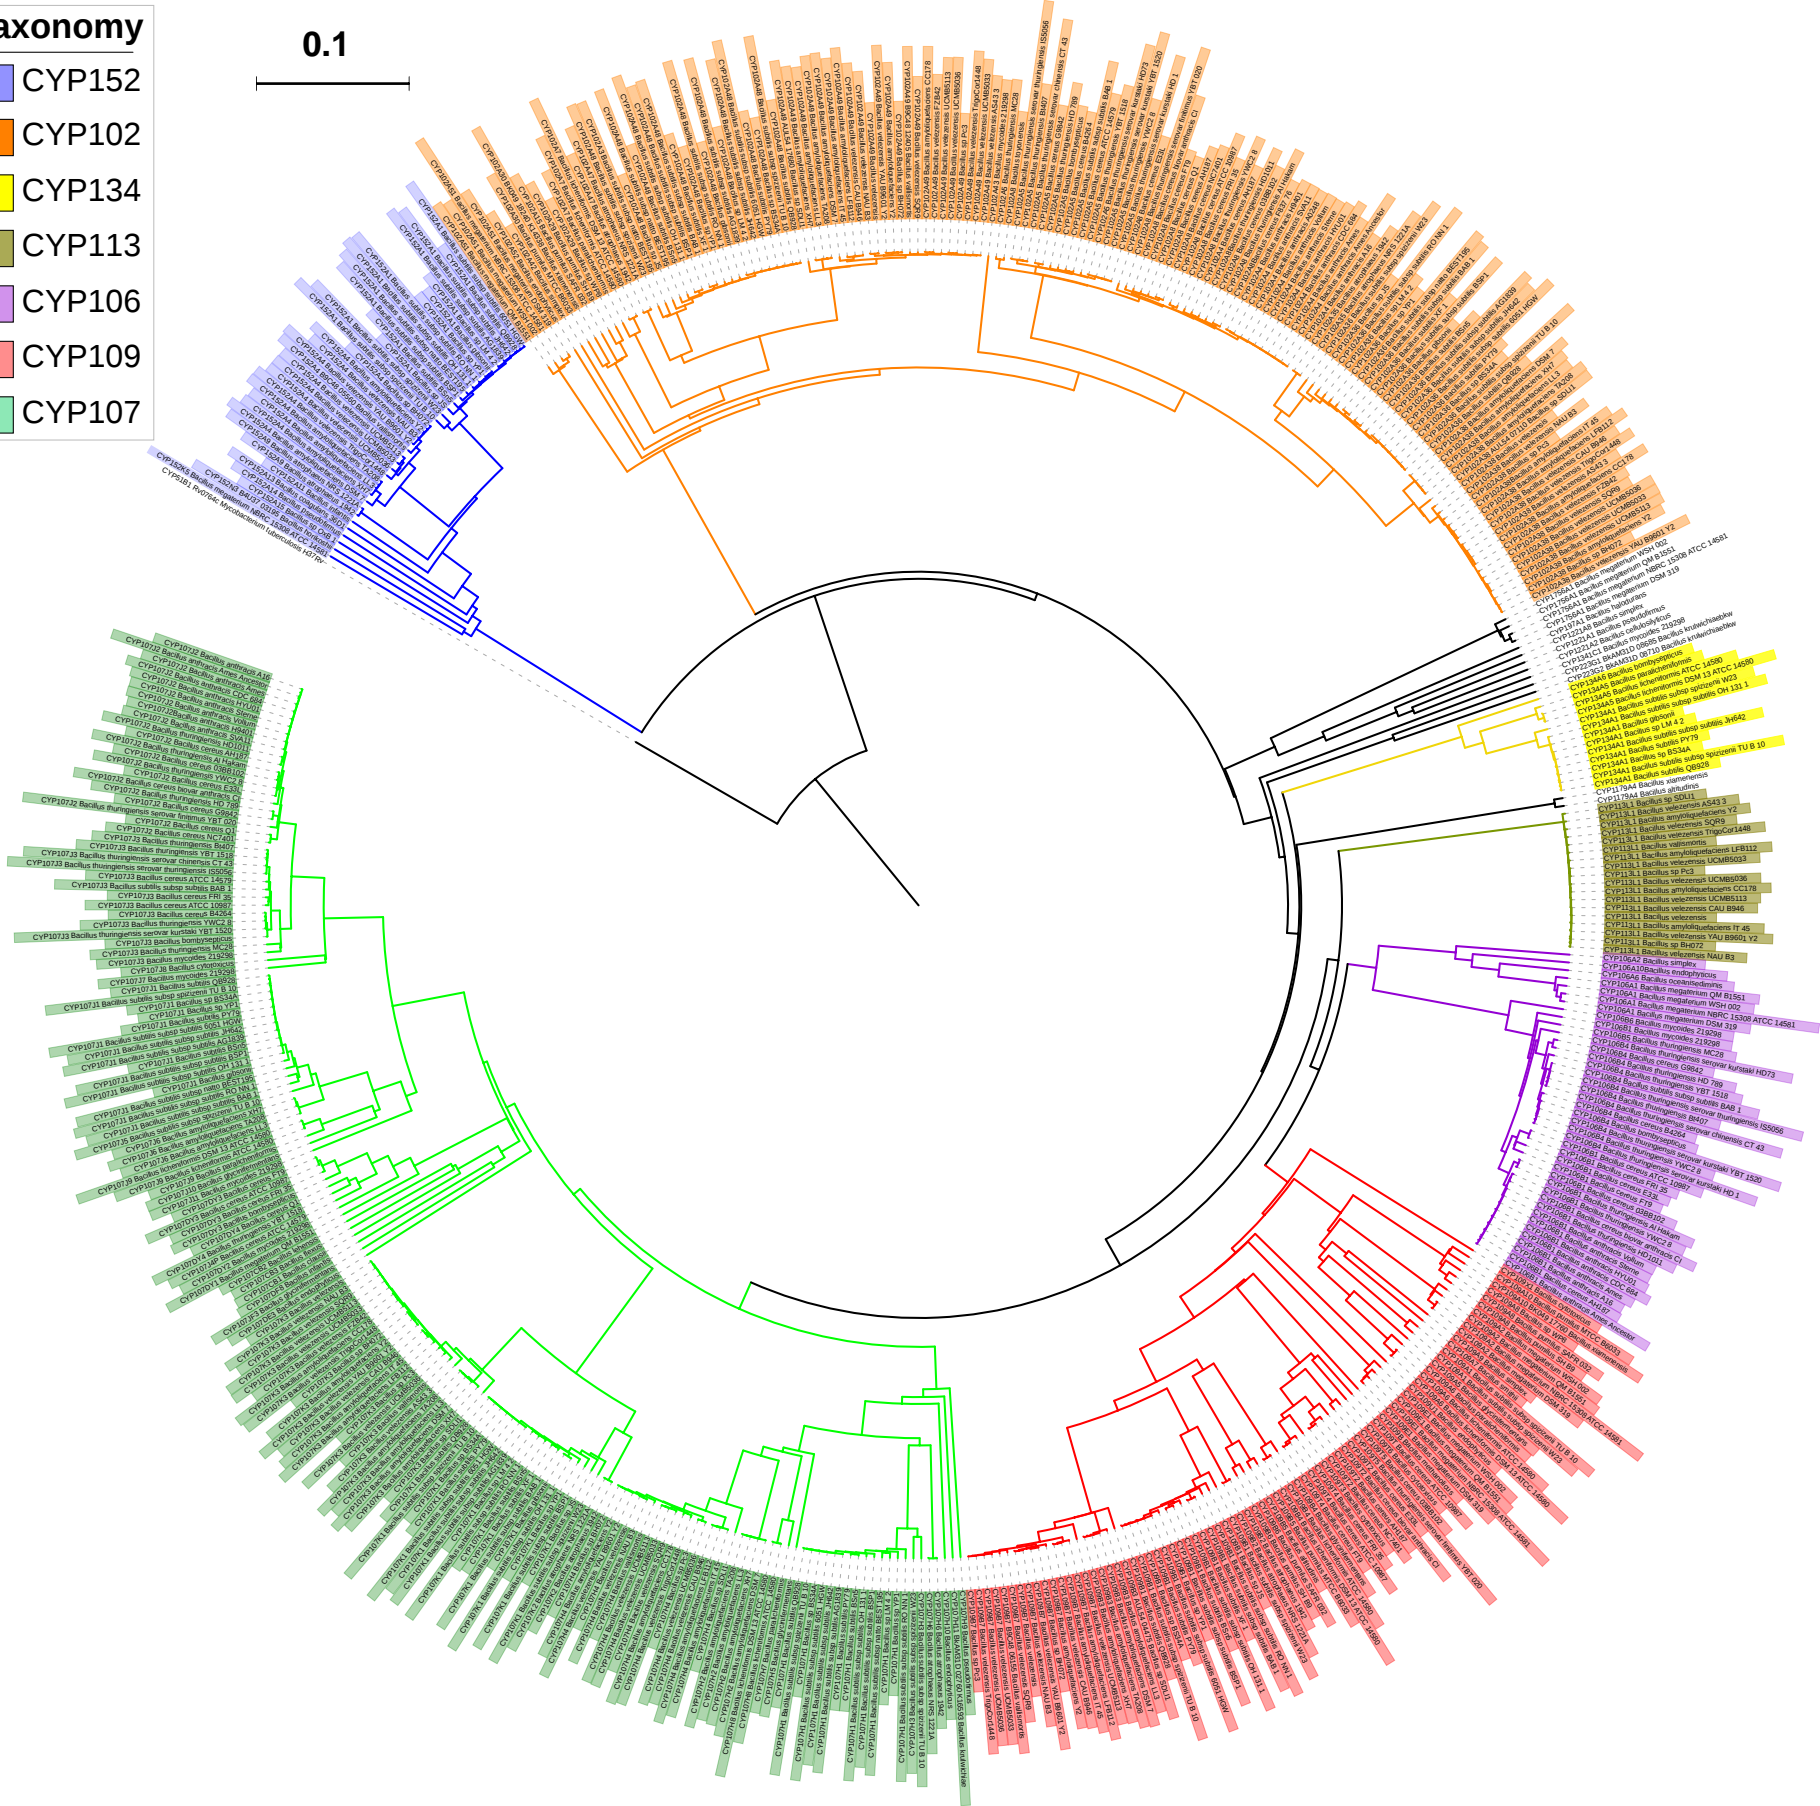

Supplement: s1 [file s1]
